# Supplementary material for: Asset Tracking Whales—First Deployment of a Custom-Made GPS/GSM Suction Cup Tag on Migrating Humpback Whales
Source: MDPI journal article supplement (doi:10.3390/jmse9060597), 2021-05-30
Supplement: s1 [file s1]

## Supplementary Material

Table 1. Tagging details for two humpback whales.

| Tag                 | Latitude | Longitude | Duration<br>Deployment      | Distance<br>Travelled           | Average<br>Speed            | Estimated<br>Surface<br>Intervals | New<br>Positions<br>Acquired |
|---------------------|----------|-----------|-----------------------------|---------------------------------|-----------------------------|-----------------------------------|------------------------------|
| 17092020<br>(Tag 1) | -27.9810 | 153.5736  | 12:15–16:17;<br>242 minutes | 24.7 km                         | 6.4 km/h<br>over<br>16.8 km | 60                                | 43                           |
| 06102020<br>(Tag 2) | -27.9638 | 153.4626  | 11:11–16:30;<br>319 minutes | 7.5 + 14.1<br>km<br>(estimated) | 5 km/h<br>over 14<br>km     | 52                                | 8                            |

Table S2. Itemised budget for GPS/GSM suction cup tag

| Component                                                                                              | Company                  | Approximate costs in AUD |
|--------------------------------------------------------------------------------------------------------|--------------------------|--------------------------|
| GPS/GSM tag, Oyster 2                                                                                  | Gofinder                 | 200 AUD                  |
| Micro CTD                                                                                              | Star Oddi DST            | 800 AUD                  |
| VHF transmitter                                                                                        | ATS F1840 B              | 300 AUD                  |
| Magnesium release                                                                                      | www.underseareleases.com | 3 AUD                    |
| Wireless charger                                                                                       | Ebay or Amazon           | 25 AUD                   |
| Customized 'payload module'<br>suction cup float for whales with<br>VHF receptacle                     | CATS                     | 1 500 AUD                |
| 'Payload module' with integrated<br>GPS/GSM tag, wireless charging<br>modification and battery upgrade | CATS                     | 750 AUD                  |
| <b>Estimated Total Cost</b>                                                                            |                          | <b>3 500 AUD</b>         |
